# Supplementary material for: Individual, Family, and Socioeconomic Contributors to Dental Caries in Children from Low- and Middle-Income Countries
Source: MDPI journal article supplement (doi:10.3390/ijerph19127114), 2022-06-10
Supplement: s1 [file s1]

### Supplementary Tables S1-S13

| Study                         | Total sample size | Proportion (%) with Caries | 95% CI                  | Weight (%) |
|-------------------------------|-------------------|----------------------------|-------------------------|------------|
|                               |                   |                            |                         | Random     |
| Renggli, 2021                 | 1,307             | 48.125                     | 45.385 to 50.874        | 9.16       |
| Adeniyi, 2016                 | 973               | 21.686                     | 19.134 to 24.410        | 9.14       |
| Ndekero, 2021                 | 831               | 44.765                     | 41.348 to 48.220        | 9.13       |
| Folayan, 2019                 | 370               | 4.865                      | 2.908 to 7.580          | 9.03       |
| Saraiva, 2007                 | 3,189             | 28.442                     | 26.880 to 30.042        | 9.19       |
| Peres, 2009                   | 339               | 51.917                     | 46.455 to 57.346        | 9.02       |
| Pérez, 2021                   | 728               | 81.456                     | 78.439 to 84.216        | 9.12       |
| Fraiz, 2001                   | 200               | 32.500                     | 26.063 to 39.465        | 8.88       |
| Moura-2005                    | 343               | 44.315                     | 38.981 to 49.748        | 9.02       |
| Borges, 2020                  | 1,993             | 41.194                     | 39.023 to 43.392        | 9.18       |
| Ayele, 2013                   | 842               | 36.342                     | 33.087 to 39.694        | 9.13       |
| <i>Total (random effects)</i> | <i>11,115</i>     | <i>38.696</i>              | <i>28.412 to 49.518</i> | <i>100</i> |

**Table S1.** Proportion of individual studies presented as percentage with 95% Confidence Intervals for Caries Prevalence in the total Sample. The table depicts the weight (%) of included studies.

| Study                         | Sample size with Caries | Proportion (%) of Females | 95% CI                  | Weight (%) |
|-------------------------------|-------------------------|---------------------------|-------------------------|------------|
|                               |                         |                           |                         | Random     |
| Renggli, 2021                 | 629                     | 49.762                    | 45.784 to 53.742        | 31.42      |
| Adeniyi, 2016                 | 211                     | 53.081                    | 46.108 to 59.966        | 10.57      |
| Ndekero, 2021                 | 372                     | 50.269                    | 45.069 to 55.464        | 18.60      |
| Folayan, 2019                 | 18                      | 61.111                    | 35.745 to 82.701        | 0.95       |
| Peres, 2009                   | 176                     | 43.750                    | 36.298 to 51.416        | 8.83       |
| Pérez, 2021                   | 593                     | 49.410                    | 45.313 to 53.512        | 29.63      |
| <i>Total (random effects)</i> | <i>1999</i>             | <i>49.675</i>             | <i>47.488 to 51.864</i> | <i>100</i> |

**Table S2.** Proportion of individual studies presented as percentage with 95% confidence intervals for female gender prevalence in the sample with caries. The table depicts the weight (%) of included studies.

| Study                         | Sample size | Proportion (%) | 95% CI                  | Weight (%)    |
|-------------------------------|-------------|----------------|-------------------------|---------------|
|                               |             |                |                         | Random        |
| Ndekero, 2021                 | 372         | 99.462         | 98.071 to 99.935        | 14.65         |
| Folayan, 2019                 | 18          | 27.778         | 9.695 to 53.480         | 12.86         |
| Peres, 2009                   | 176         | 68.750         | 61.343 to 75.512        | 14.53         |
| Pérez, 2021                   | 593         | 60.202         | 56.136 to 64.167        | 14.69         |
| Fraiz, 2001                   | 65          | 53.846         | 41.033 to 66.298        | 14.16         |
| Moura-2005                    | 152         | 54.605         | 46.338 to 62.689        | 14.49         |
| Ayele, 2013                   | 306         | 92.157         | 88.555 to 94.910        | 14.63         |
| <i>Total (random effects)</i> | <i>1682</i> | <i>69.741</i>  | <i>47.839 to 87.728</i> | <i>100.00</i> |

**Table S3.** Proportion of individual studies presented as percentage with 95% confidence intervals for sugary drinks/sweets consumption in the sample with caries. The table depicts the weight (%) of included studies.

| Study                         | Sample size | Proportion (%) | 95% CI                  | Weight (%)    |
|-------------------------------|-------------|----------------|-------------------------|---------------|
|                               |             |                |                         | Random        |
| Ndekero, 2021                 | 372         | 23.118         | 18.928 to 27.742        | 14.58         |
| Folayan, 2019                 | 18          | 55.556         | 30.757 to 78.470        | 12.70         |
| Peres, 2009                   | 176         | 73.864         | 66.719 to 80.186        | 14.46         |
| Pérez, 2021                   | 593         | 37.774         | 33.857 to 41.814        | 14.63         |
| Moura-2005                    | 152         | 82.237         | 75.218 to 87.956        | 14.42         |
| Borges, 2020                  | 821         | 82.339         | 79.555 to 84.888        | 14.65         |
| Ayele, 2013                   | 306         | 39.216         | 33.710 to 44.932        | 14.56         |
| <i>Total (random effects)</i> | <i>2438</i> | <i>56.872</i>  | <i>35.388 to 77.079</i> | <i>100.00</i> |

**Table S4.** Proportion of individual studies presented as percentage with 95% confidence intervals for good brushing habits/  $\geq 2$  daily teeth in the sample with caries. The table depicts the weight (%) of included studies.

| Study                         | Sample size | Proportion (%) | 95% CI                 | Weight (%)    |
|-------------------------------|-------------|----------------|------------------------|---------------|
|                               |             |                |                        | Random        |
| Ndekero, 2021                 | 372         | 14.247         | 10.858 to 18.218       | 33.17         |
| Borges, 2020                  | 821         | 3.776          | 2.580 to 5.317         | 33.97         |
| Ayele, 2013                   | 306         | 14.379         | 10.646 to 18.819       | 32.86         |
| <i>Total (random effects)</i> | <i>1499</i> | <i>10.142</i>  | <i>3.337 to 20.068</i> | <i>100.00</i> |

**Table S5.** Proportion of individual studies presented as percentage with 95% confidence intervals for no educational status in the mothers in the sample with caries. The table depicts the weight (%) of included studies.

| Study                         | Sample size | Proportion (%) | 95% CI                  | Weight (%)    |
|-------------------------------|-------------|----------------|-------------------------|---------------|
|                               |             |                |                         | Random        |
| Ndekero, 2021                 | 372         | 73.118         | 68.306 to 77.558        | 14.42         |
| Saraiva, 2007                 | 907         | 36.494         | 33.354 to 39.722        | 14.56         |
| Peres, 2009                   | 176         | 56.818         | 49.154 to 64.249        | 14.17         |
| Pérez, 2021                   | 593         | 54.637         | 50.532 to 58.697        | 14.51         |
| Fraiz, 2001                   | 65          | 38.462         | 26.654 to 51.357        | 13.42         |
| Borges, 2020                  | 821         | 23.264         | 20.414 to 26.308        | 14.55         |
| Ayele, 2013                   | 306         | 17.647         | 13.544 to 22.390        | 14.37         |
| <i>Total (random effects)</i> | <i>3240</i> | <i>42.458</i>  | <i>27.985 to 57.625</i> | <i>100.00</i> |

**Table S6.** Proportion of individual studies presented as percentage with 95% confidence intervals for primary educational status in the mothers in the sample with caries. The table depicts the weight (%) of included studies.

| Study                  | Sample size | Proportion (%) | 95% CI           | Weight (%) |
|------------------------|-------------|----------------|------------------|------------|
|                        |             |                |                  | Random     |
| Ndekero, 2021          | 372         | 12.634         | 9.433 to 16.445  | 14.49      |
| Saraiva, 2007          | 907         | 45.865         | 42.585 to 49.172 | 14.70      |
| Peres, 2009            | 176         | 42.045         | 34.659 to 49.705 | 14.10      |
| Pérez, 2021            | 593         | 45.363         | 41.303 to 49.468 | 14.62      |
| Fraiz, 2001            | 65          | 61.538         | 48.643 to 73.346 | 13.00      |
| Borges, 2020           | 821         | 57.856         | 54.395 to 61.261 | 14.68      |
| Ayele, 2013            | 306         | 55.556         | 49.794 to 61.209 | 14.41      |
| Total (random effects) | 3240        | 44.958         | 33.001 to 57.218 | 100.00     |

**Table S7.** Proportion of individual studies presented as percentage with 95% confidence intervals for secondary and/or higher educational status in the mothers in the sample with caries. The table depicts the weight (%) of included studies.

| Study                  | Sample size | Proportion (%) | 95% CI           | Weight (%) |
|------------------------|-------------|----------------|------------------|------------|
|                        |             |                |                  | Random     |
| Ndekero, 2021          | 372         | 35.484         | 30.620 to 40.581 | 33.53      |
| Moura-2005             | 152         | 84.868         | 78.165 to 90.160 | 33.02      |
| Ayele, 2013            | 306         | 39.216         | 33.710 to 44.932 | 33.45      |
| Total (random effects) | 830         | 54.084         | 26.632 to 80.253 | 100.00     |

**Table S8.** Proportion of individual studies presented as percentage with 95% confidence intervals for helping child with toothbrushing in the sample with caries. The table depicts the weight (%) of included studies.

| Study                  | Sample size | Proportion (%) | 95% CI           | Weight (%) |
|------------------------|-------------|----------------|------------------|------------|
|                        |             |                |                  | Random     |
| Ndekero, 2021          | 372         | 52.151         | 46.940 to 57.326 | 49.71      |
| Saraiva, 2007          | 907         | 26.902         | 24.040 to 29.915 | 50.29      |
| Total (random effects) | 1279        | 39.095         | 16.584 to 64.403 | 100.00     |

**Table S9.** Proportion of individual studies presented as percentage with 95% confidence intervals for children with caries using fluoride toothpaste. The table depicts the weight (%) of included studies.

| Study                  | Sample size | Proportion (%) | 95% CI           | Weight (%) |
|------------------------|-------------|----------------|------------------|------------|
|                        |             |                |                  | Random     |
| Renggli, 2021          | 629         | 40.223         | 36.365 to 44.173 | 14.58      |
| Folayan, 2019          | 18          | 44.444         | 21.530 to 69.243 | 12.72      |
| Saraiva, 2007          | 907         | 10.254         | 8.356 to 12.414  | 14.60      |
| Peres, 2009            | 176         | 22.727         | 16.761 to 29.636 | 14.41      |
| Pérez, 2021            | 593         | 52.614         | 48.506 to 56.695 | 14.58      |
| Borges, 2020           | 821         | 10.231         | 8.243 to 12.510  | 14.60      |
| Ayele, 2013            | 306         | 81.699         | 76.903 to 85.870 | 14.51      |
| Total (random effects) | 3450        | 35.904         | 16.732 to 57.788 | 100.00     |

**Table S10.** Proportion of individual studies presented as percentage with 95% confidence intervals to determine low socioeconomic status of children/their families with caries. The table depicts the weight (%) of included studies.

| Study                  | Sample size | Proportion (%) | 95% CI           | Weight (%) |
|------------------------|-------------|----------------|------------------|------------|
|                        |             |                |                  | Random     |
| Renggli, 2021          | 629         | 27.186         | 23.744 to 30.844 | 14.65      |
| Folayan, 2019          | 18          | 22.222         | 6.409 to 47.637  | 12.39      |
| Saraiva, 2007          | 907         | 22.161         | 19.497 to 25.007 | 14.67      |
| Peres, 2009            | 176         | 49.432         | 41.826 to 57.057 | 14.44      |
| Pérez, 2021            | 593         | 30.691         | 26.999 to 34.577 | 14.64      |
| Borges, 2020           | 821         | 77.345         | 74.325 to 80.167 | 14.66      |
| Ayele, 2013            | 306         | 18.954         | 14.719 to 23.802 | 14.56      |
| Total (random effects) | 3450        | 35.388         | 18.044 to 55.001 | 100.00     |

**Table S11.** Proportion of individual studies presented as percentage with 95% confidence intervals to determine middle socioeconomic status of children/their families with caries. The table depicts the weight (%) of included studies.

| Study                  | Sample size | Proportion (%) | 95% CI           | Weight (%) |
|------------------------|-------------|----------------|------------------|------------|
|                        |             |                |                  | Random     |
| Renggli, 2021          | 629         | 18.283         | 15.338 to 21.530 | 22.61      |
| Folayan, 2019          | 18          | 33.333         | 13.343 to 59.007 | 11.11      |
| Saraiva, 2007          | 907         | 34.620         | 31.523 to 37.817 | 22.83      |
| Peres, 2009            | 176         | 25.000         | 18.790 to 32.072 | 20.89      |
| Pérez, 2021            | 593         | 16.695         | 13.781 to 19.945 | 22.56      |
| Total (random effects) | 2323        | 24.511         | 16.212 to 33.898 | 100.00     |

**Table S12.** Proportion of individual studies presented as percentage with 95% confidence intervals to determine high socioeconomic status of children/their families with caries. The table depicts the weight (%) of included studies.

| Study                  | Sample size | Proportion (%) | 95% CI           | Weight (%) |
|------------------------|-------------|----------------|------------------|------------|
|                        |             |                |                  | Random     |
| Adeniyi, 2016          | 973         | 15.930         | 13.685 to 18.383 | 20.03      |
| Saraiva, 2007          | 1596        | 56.454         | 53.980 to 58.904 | 20.08      |
| Pérez, 2021            | 728         | 45.879         | 42.214 to 49.578 | 19.99      |
| Peres, 2009            | 339         | 46.313         | 40.910 to 51.781 | 19.80      |
| Borges, 2020           | 1993        | 60.763         | 58.579 to 62.914 | 20.10      |
| Total (random effects) | 5629        | 44.438         | 27.728 to 61.824 | 100.00     |

**Table S13.** Proportion of individual studies presented as percentage with 95% confidence intervals to determine the access to dental services among both groups. The table depicts the weight (%) of included studies.
